# Supplementary material for: Implication du facteur de transcription NF-kB dans la résistance à l'apoptose des cellules de lymphomes T cutanés épidermotropes : modulation pharmacologique
Source: Springer Nature journal article supplement (doi:10.1007/s12325-020-01538-0), 2006-01-01
Supplement: MOESM1 [file 18534718]

Patients randomized  
(n = 61)

Not treated  
(n = 1)

Trilaciclib 240 mg/m<sup>2</sup> prior to  
topotecan 1.5 mg/m<sup>2</sup>  
(n = 32)

Placebo prior to  
topotecan 1.5 mg/m<sup>2</sup>  
(n = 29)

**Study drug disposition**

Ongoing (n = 1)

Discontinued (n = 31)

- Disease progression (n = 24)
- Withdrawal of consent by patient (n = 2)
- Withdrawal of consent by investigator (n = 1)
- Adverse event (n = 4)

**Study drug disposition**

Ongoing (n = 0)

Discontinued (n = 28)

- Disease progression (n = 13)
- Withdrawal of consent by patient (n = 5)
- Withdrawal of consent by investigator (n = 1)
- Adverse event (n = 7)
- Other (n = 2)

**Study drug disposition**

Ongoing (n = 1)

Discontinued (n = 31)

- Withdrawal of consent by patient (n = 1)
- Death (n = 29)
  - Lung cancer (n = 28)
  - Cerebrovascular insult/event (n = 1)
- Other (n = 1)

**Study drug disposition**

Ongoing (n = 0)

Discontinued (n = 29)

- Withdrawal of consent by patient (n = 3)
- Death (n = 24)
  - Lung cancer (n = 23)
  - Septicemia (n = 1)
- Lost to follow-up (n = 1)
- Other (n = 1)
