# Supplementary figures and images for: Implication du facteur de transcription NF-kB dans la résistance à l'apoptose des cellules de lymphomes T cutanés épidermotropes : modulation pharmacologique
Source: Springer Nature journal article supplement (doi:10.1007/s12325-020-01538-0), 2006-01-01

A

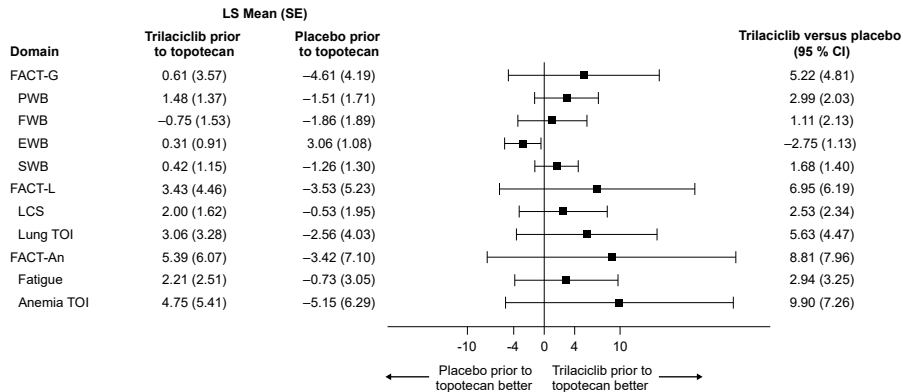

B

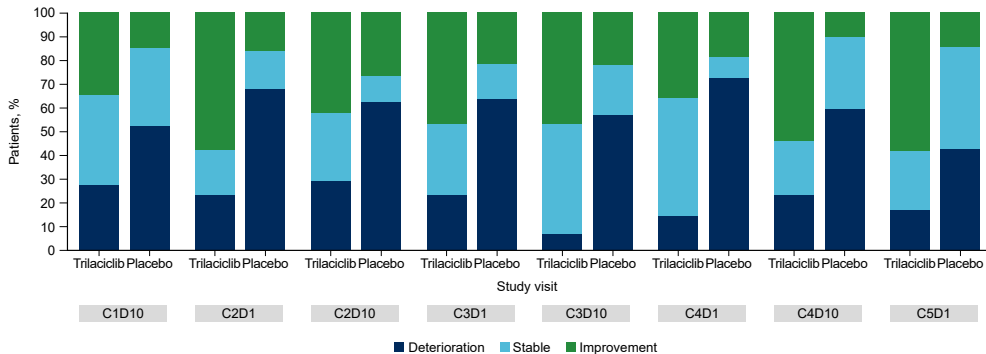

Supplement: MOESM2 [file 18534718]
